# Supplementary material for: Biomimetic synthesis of Ag3PO4-NPs/Cu-NWs with visible-light-enhanced photocatalytic activity for degradation of the antibiotic ciprofloxacin
Source: Royal Society of Chemistry journal article supplement (doi:10.1039/c6dt04656h), 2017-01-01
Supplement: c6dt04656h1.pdf [file c6dt04656h1.pdf]

### Electronic Supporting Information

Biomimetic synthesis of 1D  $\text{Ag}_3\text{PO}_4$ -NPs/Cu-NWs with visible-light-enhanced photocatalytic activity for degradation of antibiotic Ciprofloxacin

Yuling Liu<sup>a</sup>, Qingsheng Wu<sup>b,\*</sup>

<sup>a</sup> Tongji University, 1239 Siping Road, Shanghai 200092, China. E-mail: [qswu@tongji.edu.cn](mailto:qswu@tongji.edu.cn);

<sup>b</sup> Department of Chemistry and Chemical, Heze College, 2269 Daxue Road, HeZe 274015, China.

\*Corresponding author:  
Qingsheng Wu

Phone: (0086) 021-65982620

Fax: (0086) 021-65982620

Email address: [qswu@tongji.edu.cn](mailto:qswu@tongji.edu.cn)

Fig. S1 shows the SEM and TEM images of  $\text{Ag}_3\text{PO}_4$ @Cu NWs ( $\text{AC}_{0.15}$ ,  $\text{AC}_{0.3}$  and  $\text{AC}_{0.45}$ ). From which we can see that the  $\text{Ag}_3\text{PO}_4$  NPs in  $\text{AC}_{0.15}$  are Small and thin compared with the other two samples ( $\text{AC}_{0.3}$  and  $\text{AC}_{0.45}$ ). In comparison, the morphology of the  $\text{AC}_{0.3}$  is the best.

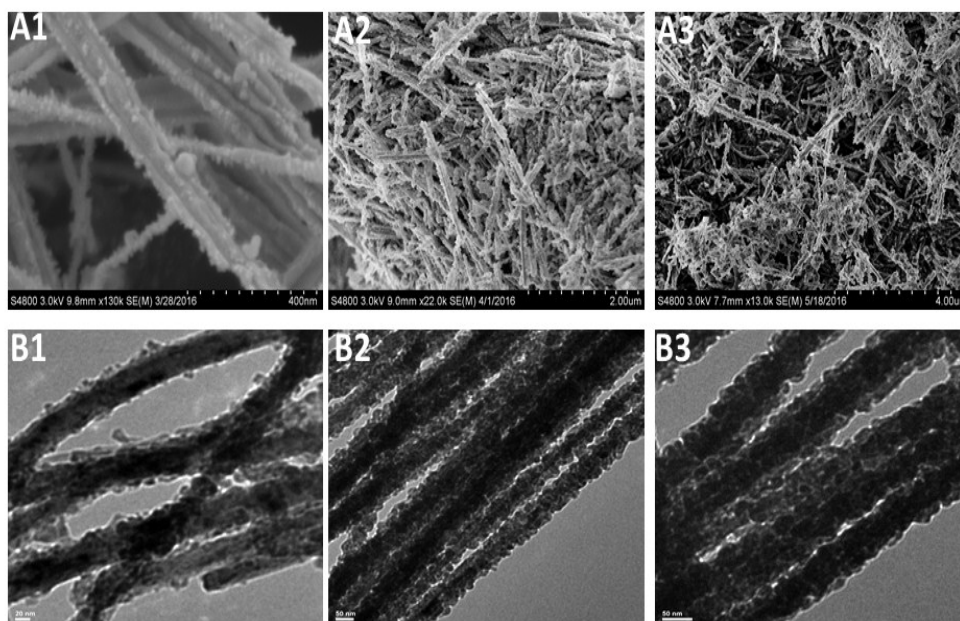

Fig.S1 SEM images (A1-A3) of  $\text{Ag}_3\text{PO}_4$ @Cu NWs( $\text{AC}_{0.15}$ ,  $\text{AC}_{0.3}$  and  $\text{AC}_{0.45}$ ,

respectively); TEM images (B1-B3) of  $\text{Ag}_3\text{PO}_4@\text{Cu}$  NWs ( $\text{AC}_{0.15}$ ,  $\text{AC}_{0.3}$  and  $\text{AC}_{0.45}$ , respectively).

Fig. S2 shows the XRD patterns of  $\text{Ag}_3\text{PO}_4@\text{Cu}$  NWs ( $\text{AC}_{0.15}$ ,  $\text{AC}_{0.3}$ ,  $\text{AC}_{0.45}$ ). According to the XRD patterns, we know the peak of  $\text{Ag}_3\text{PO}_4$  NPs in  $\text{AC}_{0.45}$  is very weak while the peak of Ag becomes strong and all the diffraction peaks of Ag belong to JCPDS#87-0717, this indicates that the replacement reaction of  $\text{Ag}^+/\text{Cu}$  happens more with the increase of concentration of  $[\text{Ag}^+]$ , so controlling the concentration of  $[\text{Ag}^+]$  is very important also in the process of biomimetic synthesis.

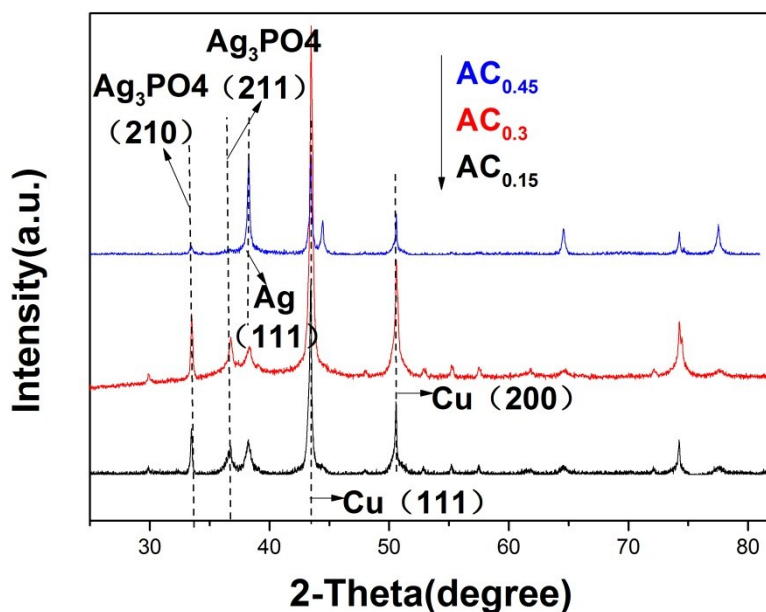

Fig.S2 the XRD patterns of  $\text{Ag}_3\text{PO}_4@\text{Cu}$  NWs ( $\text{AC}_{0.15}$ ,  $\text{AC}_{0.3}$ ,  $\text{AC}_{0.45}$ )

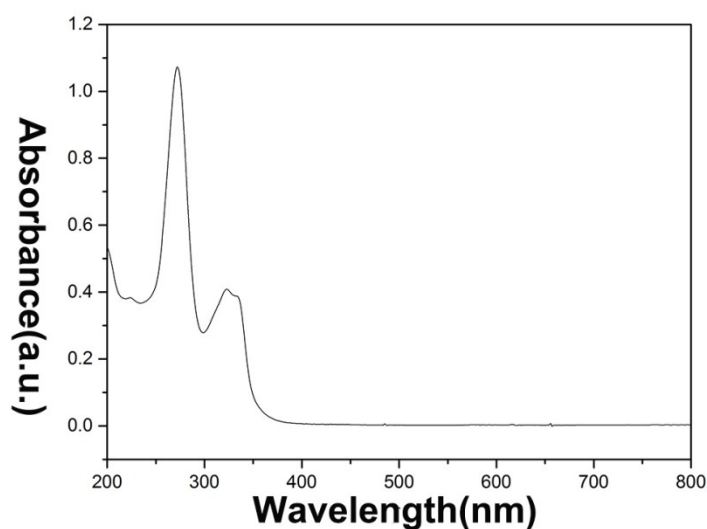

Fig. S3 The absorption spectrums of CPFX

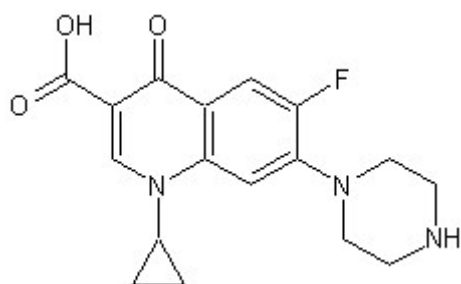

Fig. S4 The chemical structural formula of CPFX

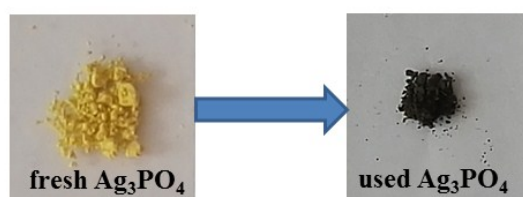

Fig. S5 the color change of  $\text{Ag}_3\text{PO}_4$  before and after use
